# Supplementary material
Source: HighWire-hosted journal article supplement (https://www.genetics.org/content/suppl/2014/01/14/genetics.113.159970)
Supplement: genetics.113.159970-13.pdf [file genetics.113.159970-13.pdf]

**Table S3** The SNP frequencies on each Nipponbare chromosome.

| Chr   | MH63   | ZS97   | 93-11  | ZH11   | <i>O.nivara</i> | <i>O.glaberrima</i> | <i>OR106424</i> |
|-------|--------|--------|--------|--------|-----------------|---------------------|-----------------|
| Chr1  | 0.1094 | 0.0997 | 0.1532 | 0.0441 | 0.3143          | 0.2595              | 0.2125          |
| Chr2  | 0.1090 | 0.1301 | 0.1719 | 0.0300 | 0.3394          | 0.2808              | 0.2166          |
| Chr3  | 0.1235 | 0.1125 | 0.1639 | 0.0370 | 0.3342          | 0.2714              | 0.2259          |
| Chr4  | 0.2780 | 0.2750 | 0.3298 | 0.1570 | 0.4616          | 0.2416              | 0.7928          |
| Chr5  | 0.1219 | 0.1118 | 0.1718 | 0.0630 | 0.3967          | 0.2641              | 0.2646          |
| Chr6  | 0.1181 | 0.1165 | 0.1785 | 0.1086 | 0.3562          | 0.2457              | 0.2785          |
| Chr7  | 0.1164 | 0.1265 | 0.1657 | 0.0425 | 0.3270          | 0.2535              | 0.2173          |
| Chr8  | 0.1075 | 0.1059 | 0.1552 | 0.0401 | 0.3349          | 0.2700              | 0.2258          |
| Chr9  | 0.1178 | 0.0869 | 0.1660 | 0.0350 | 0.2931          | 0.2680              | 0.2155          |
| Chr10 | 0.1299 | 0.1349 | 0.1667 | 0.0349 | 0.3001          | 0.2649              | 0.2156          |
| Chr11 | 0.1236 | 0.1261 | 0.1836 | 0.0461 | 0.3307          | 0.2592              | 0.2286          |
| Chr12 | 0.1217 | 0.1232 | 0.1734 | 0.0539 | 0.3509          | 0.2724              | 0.2323          |
